# Supplementary material for: Systematic Analysis Reveals Elongation Factor 2 and α-Enolase as Novel Interaction Partners of AKT2
Source: PubMed Central journal article supplement (PMC3688836; doi:10.1371/journal.pone.0066045), 2013-06-18
Supplement: pone.0066045.s005.pdf [file pone.0066045.s005.pdf]

**Table S1:** Detailed overview over all detected proteins in 6 TAPs after in-gel digest. The listed proteins were identified with more than three different peptides.

| AKT2-NTag I-VI                   |                                                                            | amino acid sequence coverage |        |        |        |        |        | MW (kDa) |
|----------------------------------|----------------------------------------------------------------------------|------------------------------|--------|--------|--------|--------|--------|----------|
|                                  |                                                                            | I                            | II     | III    | IV     | V      | VI     |          |
| Proteins (accession number)      |                                                                            | AA SC%                       | AA SC% | AA SC% | AA SC% | AA SC% | AA SC% |          |
| <b>Heat Shock Protein 90 kDa</b> |                                                                            |                              |        |        |        |        |        |          |
|                                  | Heat shock protein HSP 90-alpha (P07900)                                   | 9,3                          | 5,7    | 14,8   | 19,9   | 27,4   | 28,4   | 84       |
|                                  | Heat shock protein HSP 90-beta (P08238)                                    | 8,7                          | 2,1    | 10,9   | 12,8   |        | 26,8   | 83       |
|                                  | Cdc 37 (Q16543)                                                            | x                            | 23,3   | 26,2   | 25,1   | 17,7   | 25,7   | 44       |
|                                  | Endoplasmin (P14625)                                                       | x                            | x      | 5,2    | x      | 32,8   | 38,6   | 92       |
| <b>Heat Shock Protein 70 kDa</b> |                                                                            |                              |        |        |        |        |        | 70       |
|                                  | Heat shock 70 kDa protein 1 (P08107)                                       | x                            | 26,7   | 14     | 37,8   | 42,6   | 37,1   | 70       |
|                                  | Heat shock cognate 71 kDa protein (P11142)                                 | 28,2                         | 30,8   | -      | 35,3   | 46,6   | 47,8   | 70       |
|                                  | Heat shock 70 kDa protein 1L (P34931)                                      | 6,2                          | 5,8    | 5,9    | 16,4   | 24,6   | 18,3   | 70       |
|                                  | Heat shock-related 70 kDa protein 2 (P54652)                               | 8,4                          | 7,4    | -      | 10,5   | 7,8    | 10,5   | 70       |
|                                  | 78kDa glucose regulated protein (P11021)                                   | 36,5                         | x      | 39     | 39,1   | 43,3   | 40,2   | 72       |
|                                  | Kinesin like protein (P52732)                                              | x                            | x      | 51,3   | x      | x      | x      | 119      |
|                                  | Elongation Factor 2 (P13639)                                               | x                            | x      | 15     | x      | 46,4   | 51,4   | 95       |
|                                  | Splicing factor U2AF 65 kDa subunit (P26368)                               | x                            | x      | 21,3   | x      | x      | x      | 53       |
|                                  | Elongation factor 1 alpha (P68104)                                         | x                            | 17,3   | 30,5   | x      | 26     | 32,2   | 50       |
| <b>Tubulin</b>                   |                                                                            |                              |        |        |        |        |        |          |
|                                  | Tubulin alpha-1A chain (Q71U36)                                            | 20,6                         | 31     | 44,8   | 18     | x      | x      | 50       |
|                                  | Tubulin beta-chain (P07437)                                                | 9,9                          | 9,9    | 16     | 9,9    | x      | x      | 50       |
|                                  | Tubulin beta-2A chain (Q13885)                                             | 15,5                         | 24,5   | 36,2   | 15,7   | x      | x      | 50       |
|                                  | Tubulin beta-2C chain (P68371)                                             | 7,4                          | 10,8   | 16,9   | 7,4    | x      | x      | 50       |
|                                  | Tubulin beta-1 chain (Q9H4B7)                                              | 6,2                          | 6,4    | 6,4    | 6,4    | x      | x      | 50       |
|                                  | Alpha-Enolase (P06733)                                                     | x                            | x      | 35,7   | x      | 61,3   | 51,1   | 47       |
|                                  | Creatine kinase B-type (P12277)                                            | x                            | x      | 34,6   | x      | x      | x      | 42       |
|                                  | Methylosome protein 50 (Q9BQA1)                                            | x                            | x      | 38,9   | x      | x      | x      | 36       |
|                                  | Glyceraldehyde-3-phosphate-dehydrogenase (P04406)                          | x                            | 12,8   | 22,1   | x      | 49,6   | 51,3   | 36       |
|                                  | 60S acidic ribosomal protein (P05388)                                      | x                            | x      | 43,2   | x      | x      | x      | 34       |
|                                  | Putative heterogeneous nuclear ribonucleoprotein A1-like protein 3(P0C7M2) | x                            | x      | 28,9   | x      | x      | x      | 34       |
|                                  | 40S ribosomal protein (P23396)                                             | x                            | x      | 38,7   | x      | x      | x      | 26       |
|                                  | Cleavage and polyadenylation specificity factor su 5 (O43809)              | x                            | x      | 41,4   | x      | x      | x      | 26       |
|                                  | BTB/POZ domain-containing protein KCTD5 (Q9NXV2)                           | x                            | x      | 35,9   | x      | x      | x      | 26       |
|                                  | Peroxiredoxin-1 (Q06830)                                                   | x                            | x      | 20,1   | x      | x      | x      | 22       |
|                                  | 60S ribosomal protein (P62913)                                             | x                            | x      | 37,6   | x      | x      | x      | 20       |
|                                  | Splicing factor, arginine/serine-rich 3 (P84103)                           | x                            | x      | 38,4   | x      | x      | x      | 19       |
|                                  | ANKRD26-like family C member 1A (Q6S8J3)                                   | x                            | 4,1    | 4,5    | x      | x      | x      | 120      |
|                                  | Actin, cytoplasmic (P60709)                                                | x                            | x      | x      | x      | 13,3   | 13,3   | 41       |
|                                  | Actin, aortic smooth muscle (P62736)                                       | x                            | 19,4   | x      | x      | x      | x      | 41       |
|                                  | Ankyrin repeat domain-containing protein 1 (Q15327)                        | x                            | 17,9   | x      | x      | x      | x      | 36       |
|                                  | Triosephosphate isomerase (P60174)                                         | x                            | 16,1   | x      | x      | x      | x      | 26       |
|                                  | ATP synthase subunit beta, mitochondrial (P06576)                          | x                            | 15,3   | x      | x      | x      | x      | 56       |
|                                  | Lactate dehydrogenase B chain (P07195)                                     | x                            | 25,8   | x      | x      | 17,1   | 19,5   | 36       |
|                                  | Lactate dehydrogenase A chain (P00338)                                     | x                            | 11,7   | x      | x      | x      | x      | 36       |
|                                  | Protein arginine N-methyltransferase 5 (O14744)                            | x                            | x      | 4,9    | x      | 24,5   | 19,3   | 72       |
|                                  | Nucleolin (P19338)                                                         | x                            | x      | 6,8    | x      | x      | x      | 76       |
|                                  | Importin (O95373)                                                          | x                            | x      | 8,3    | x      | x      | x      | 119      |
|                                  | Filamin A (P21333)                                                         | x                            | x      | x      | x      | 15,7   | 6,1    | 280      |
|                                  | Filamin B (O75369)                                                         | x                            | x      | x      | x      | x      | 3,7    | 278      |
|                                  | Fatty acid synthase (P49327)                                               | x                            | x      | x      | x      | 7      | 2,9    | 273      |
|                                  | Acetyl CoA-Carboxylase (Q13085)                                            | x                            | x      | x      | x      | 19,4   | 0,8    | 265      |
|                                  | Clathrin heavy chain (Q00610)                                              | x                            | x      | x      | x      | 30,3   | 22,75  | 191      |
|                                  | Bifunctional aminoacyl-tRNA synthetase (P07814)                            | x                            | x      | x      | x      | 5,3    | 7,8    | 170      |
|                                  | Eukaryotic translation initiation factor 3 subunit A (Q14152)              | x                            | x      | x      | x      | x      | 7,1    | 166      |
|                                  | Structural maintenance of chromosomes protein 4 (Q9NTJ3)                   | x                            | x      | x      | x      | x      | 8,5    | 147      |
|                                  | Ubiquitin-like modifier –activating enzyme 1 (P22314)                      | x                            | x      | x      | x      | 22,9   | 28,7   | 117      |
|                                  | Neutral alpha-glucosidase AB (Q14697)                                      | x                            | x      | x      | x      | 27,1   | 36,9   | 106      |
|                                  | Alpha-actinin-1 (P12814)                                                   | x                            | x      | x      | x      | 16,9   | 22,5   | 102      |
|                                  | Malate dehydrogenase, cytoplasmic (P40925)                                 | x                            | x      | x      | x      | 39,5   | 41,6   | 36       |
|                                  | Malate dehydrogenase, mitochondrial (P40926)                               | x                            | x      | x      | x      | 31,9   | 43,2   | 35       |
|                                  | Ezrin (P15311)                                                             | x                            | x      | x      | x      | 24,7   | 21,3   | 69       |
|                                  | Protein disulfide-isomerase A4 (P13667)                                    | x                            | x      | x      | x      | 29,8   | 28,2   | 72       |
|                                  | Eukaryotic translation initiation factor 4B (P23588)                       | x                            | x      | x      | x      | 34     | 16,8   | 46       |
|                                  | Phosphoglycerate kinase 1 (P00558)                                         | x                            | x      | x      | x      | 34     | 34,3   | 44       |
